# Supplementary material for: Long-term Outcomes of Radical Resection vs. Combined Subtotal Resection and Gamma Knife Radiosurgery for Large Vestibular Schwannomas
Source: Research Square preprint supplement (doi:10.21203/rs.3.rs-6676378/v1), 2025-05-23
Supplement: Supplementary file 1 [file 95debebbcddd342caa36613f.docx]

| **Table 1** |  |  |  |  |
| --- | --- | --- | --- | --- |
| **Patient characteristics and Surgical outcomes** | |  |  |  |
|  |  | **Radical removal (Group R)** | **Combined subtotal removal and GK (Group C)** | **P value** |
|  |  | n=40 | n=47 |  |
| **Patient characteristics** | |  |  |  |
|  | Mean age , years (range) | 53 (30-71) | 54 (24-89) | 0.808 |
|  | Female sex - no. (%) | 23 (58%) | 30 (64%) | 0.702 |
|  | Right side - no. (%) | 27 (68%) | 27 (57%) | 0.458 |
|  | Median follow-up, months (range) | 38 (16-98) | 42 (12-127) | 0.218 |
|  |  |  |  |  |
| **Neurological status** | |  |  |  |
| Pre-removal / Post-removal / Last follow-up | |  |  |  |
|  | Hearing disturbance (>50db) - no. (%) | 27 (68%) / 35 (88%) / 38 (95%) | 31 (66%) / 34 (72%) / 44 (94%) | 1 / 0.140 / 1 |
|  | Facial weakness (>HB3)- no. (%) | 4 (10%) / 12 (30%) / 7 (18%) | 7 (15%) / 9 (19%) / 6 (13%) | 0.718 / 0.354 / 0.752 |
|  | Trigeminal dysesthesia- no. (%) | 11 (28%) / 15 (38%) / 15 (38%) | 15 (32%) / 14 (30%) / 12 (26%) | 0.831 / 0.594 / 0.332 |
|  | Diplopia- no. (%) | 0 (0%) / 2 (5%) / 2 (5%) | 0 (0%) / 2 (4%) / 1 (2%) | 1.0 /1.0 / 0.887 |
|  | Lower cranial nerve palsy- no. (%) | 1 (3%) / 2 (5%) / 2 (5%) | 1 (2%) / 1 (2%) / 1 (2%) | 1.0 / 0.887 / 0.887 |
|  | Ataxia- no. (%) | 4 (10%) / 1 (3%) / 1 (3%) | 16 (34%) / 10 (21%) / 9 (19%) | 0.016 * / 0.021* / 0.037* |
|  | Hemiparesis- no. (%) | 0 (0%) / 0 (0%) / 0 (0%) | 2 (4%) / 2 (4%) / 2 (4%) | 0.547 / 0.547 / 0.547 |
|  | Median KPS | 90 (70-100) / 90 (80-100) / 90 (80-100) | 90 (30-100) / 90 (30-100) / 90 (30-100) | 0.015* / 0.087 / 0.087 |
| **Tumor size** | |  |  |  |
| Pre-removal / Post-removal / Last follow-up | |  |  |  |
|  | Median tumor volume (range) | 7.9ml (1.6-34) / 0.3ml (0-7.9) / 0.4ml (0-8.2) | 10.8ml (3.5-71) / 3.1ml (2.3-24) / 2.8ml (1.0-22) | 0.0072* / <0.001* / <0.001* |
|  | Mean volume reduction | - / 90% / 89% | - / 58% / 68% | - / <0.001* / <0.001* |
|  |  |  |  |  |
| **Surgical Approach** | |  |  |  |
|  | Retrosigmoid / Trans-petrosal | 33 (83%) / 7 (17%) | 40 (85%) / 7 (15%) | 0.9705 |
|  | IAC drilling | 14 (35%) | 12 (26%) | 0.468 |
|  |  |  |  |  |
| **GK treatment** | |  |  |  |
|  | Duration after surgery, median (range) | - | 4 months (1-12) |  |
|  | Margin dose, median (range) | - | 12 Gy (10-13) |  |
|  | Margin % isodose, median (range) | - | 50% (50-55) |  |
|  | Maximum dose, median (range) | - | 24 Gy (20-24) |  |
|  |  |  |  |  |
| **Subsequent Intervention** | |  |  |  |
|  | VP shunt | 2 (5%) | 9 (19%) | 0.098 |
|  | Salvage surgery | 0 (0%) | 2 (4%) | 0.547 |
|  | Additional GK | 0 (0%) | 1 (2%) | 0.547 |
|  |  |  |  |  |
| GK, Gamma Knife; HB, House-Brackmann scale; KPS, Karnofsky Performance Status; IAC, internal auditory canal; VP shunt, ventriculoperitoneal shunt | | | |  |
