# Supplementary material for: Long-term Outcomes of Radical Resection vs. Combined Subtotal Resection and Gamma Knife Radiosurgery for Large Vestibular Schwannomas
Source: Research Square preprint supplement (doi:10.21203/rs.3.rs-6676378/v1), 2025-05-23
Supplement: Supplementary file 2 [file bed05cdff7bfc6143a9841fa.docx]

| **Table 2** |  |  |  |  |  |  |  |
| --- | --- | --- | --- | --- | --- | --- | --- |
| **Previous reports comparing removal surgery and GK for large VS** | | |  |  |  |  |  |
|  |  |  |  |  |  |  |  |
| Authors (reference No.) | Year | Number of cases | Follow-up, years | Tumor Control, % | Hearing Preservation, % | Facial Preservation, % | Additional Findings |
|  | (Removal /GK) | (Removal/GK) | (Removal/GK) | (Removal/GK) | (Removal/GK) |  |
| Pollock BE (11) | 1995 | 87 (36/51) | N/A | 100/98 | 47/71* | 71/98* | Shorter hospital stay with GK |
| Pollock BE (10) | 2006 | 82 (36/46) | 3.5/3.5 | 100/96 | 14.3/42.9* | 77/100* | Better QOL score with GK |
| Golfinos JG (3) | 2016 | 189 (83/83) | 3/1.6 | 98/98 | 14.3/42.9* | 89/100 | Similar tumor control rates |
| Yakkala VK (18) | 2022 | 987 (591/396) | Meta-analysis^ | 94/80 | OR 3.52/3.03 # | 85.7/93* | Less facial symmetry loss with GK |
| Tatagiba M (16) | 2023 | 901 (581/320) | 7 | Koos I-II: 93/89 | Small tumors* similar | Small tumors: similar | Better symptoms improvement with MRI |
|  |  |  |  | Koos III-IV: 96/85* | Large tumors: Better with GK | Large tumors: better with GK |  |
| Present study | 2025 | 87 (Removal 40/ Combined 47) | 3.2/3.5 | 100/94 | 5/6 (<50db) | 82/87 | Trigeminal dysesthesia improced in combined treatment |
|  |  |  |  |  |  |  |  |
| GK, Gamma Knife; QOL, guality of life; N/A, not available | | |  |  |  |  |  |
| *P< 0.05 |  |  |  |  |  |  |  |
| ^ Systematic review and meta-analysis of 21 studies published through Januari 2021 | | | |  |  |  |  |
| # Odds ratio for hearing loss (both groups showed similar increase odds of hearing loss post intervention) | | | |  |  |  |  |
